# Supplementary material for: Distance produces beauty? regulating the distance of Fe atomic pairs to enhance electrocatalytic CO2reduction
Source: Royal Society of Chemistry journal article supplement (doi:10.1039/d3qm00261f), 2023-01-01
Supplement: d3qm00261f1.pdf [file d3qm00261f1.pdf]

*Supporting Information*

**Distance Produces Beauty? Regulating the Distance of Fe Atomic Pairs to Enhance Electrocatalytic CO<sub>2</sub> Reduction**

Xiaofei Wei,<sup>a</sup> Huakai Xu,<sup>a</sup> Chuanhai Jiang,<sup>a</sup> Zhifei Wang,<sup>a</sup> Yuguo Ouyang,<sup>a</sup> Chunyu Lu,<sup>a</sup> Yuan Jing,<sup>a</sup> Shiwei Yao,<sup>a</sup> Xiaoqing Lu,<sup>a</sup> Fangna Dai<sup>a,\*</sup>

<sup>a</sup> *School of Materials Science and Engineering, China University of Petroleum, Qingdao, Shandong 266580, P. R. China*

\*Corresponding author: Fangna Dai

E-mail address: [fndai@upc.edu.cn](mailto:fndai@upc.edu.cn)

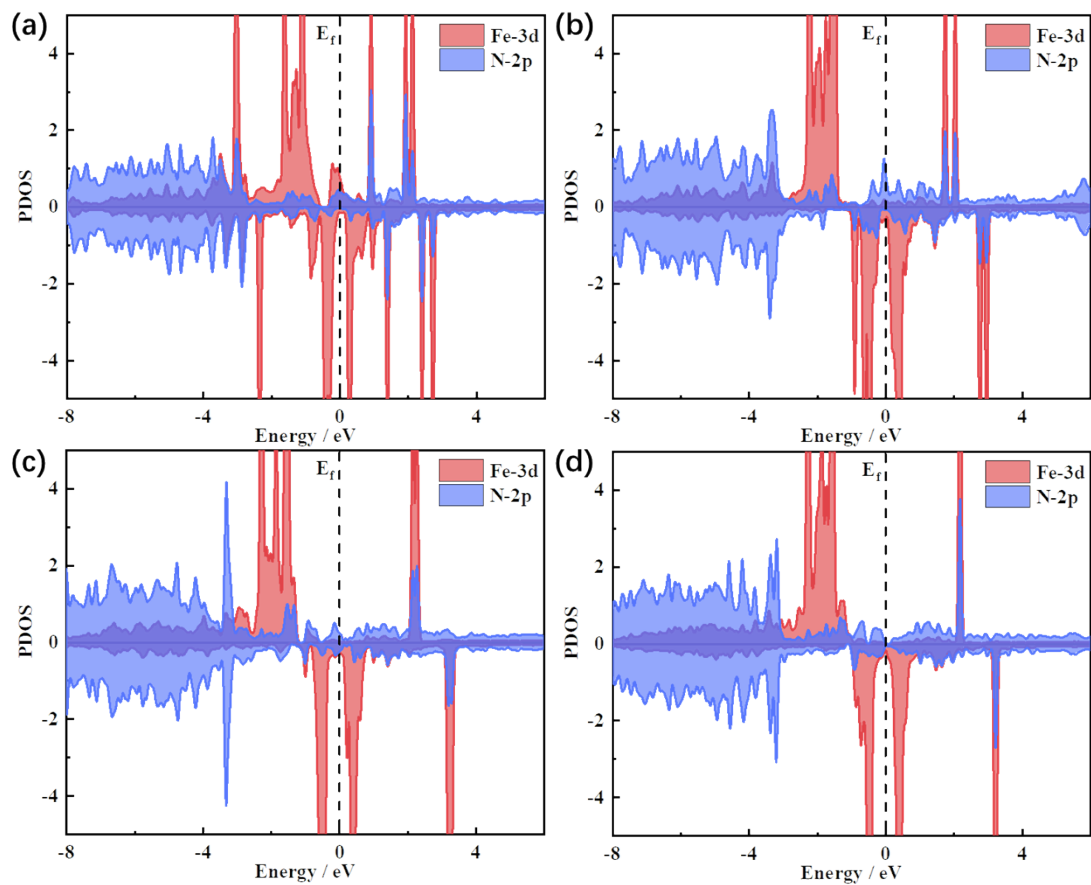

Figure S1. Partial density of states (PDOS) between N 2p-orbital and Fe 3d-orbital of four catalysts, respectively.

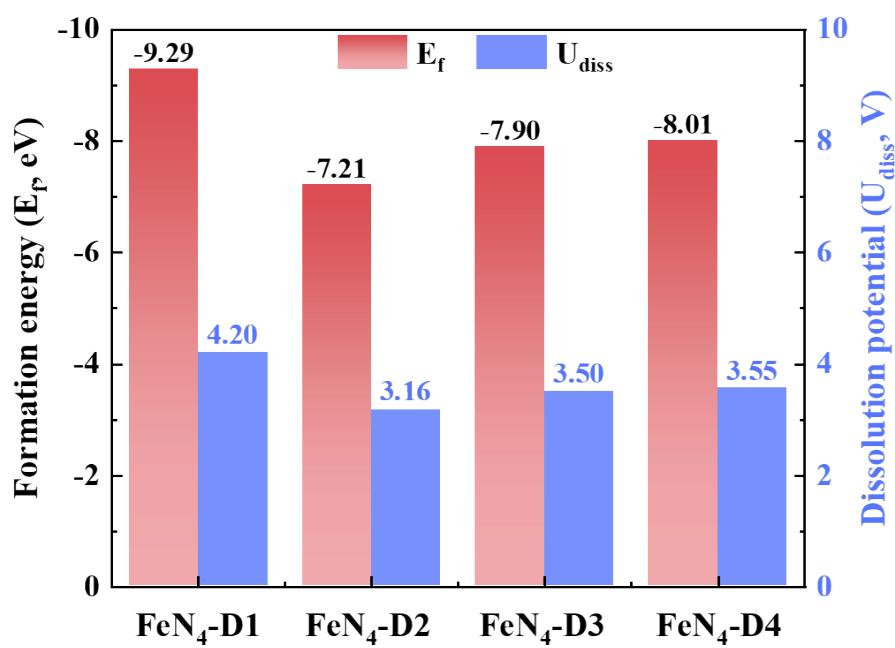

Figure S2. Forming energy ( $E_f$ , eV) and dissolution potential ( $U_{diss}$ , V) of four catalysts.

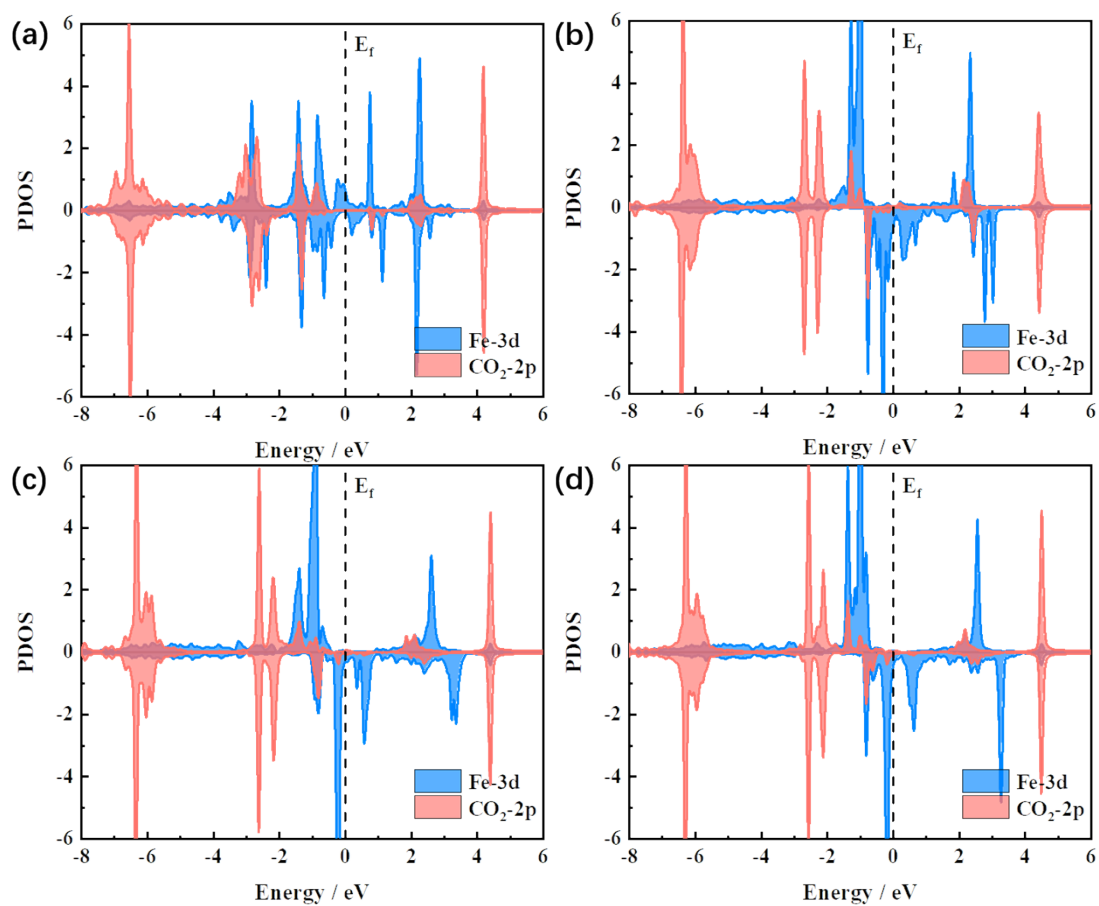

Figure S3. Partial density of states (PDOS) between CO<sub>2</sub> 2p-orbital and Fe 3d-orbital of four catalysts, respectively.

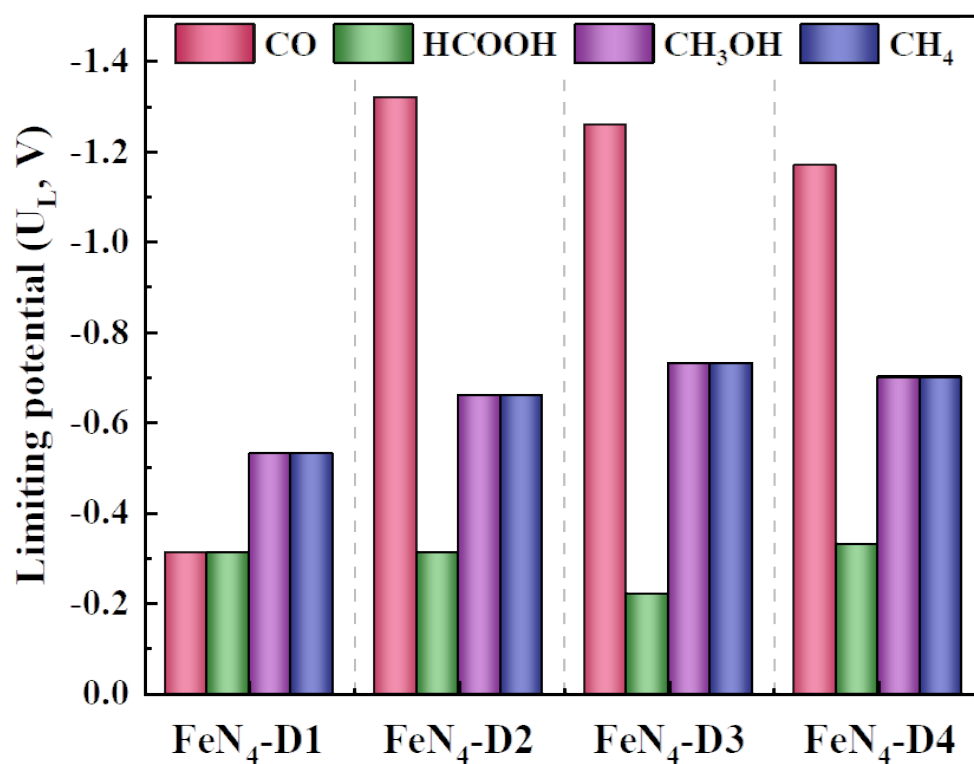

Figure S4. Summary of the limiting potential ( $U_L$ ) of the products for CO, HCOOH, CH<sub>3</sub>OH, and CH<sub>4</sub> on four FeN<sub>4</sub>-D<sub>x</sub> ( $x = 1, 2, 3, 4$ ) structures.

Table S1. The bond length ( $D$ , Å), Bader charge transfer ( $|e|$ ), magnetic moments ( $M$ ,  $\mu_B$ ), and d-band center ( $\epsilon_d$ ) of four  $\text{FeN}_4\text{-D}_x$  ( $x = 1, 2, 3, 4$ ) structures.

| Structure                 | D (Å) |      | Bader ( $ e $ ) | M ( $\mu_B$ ) | $\epsilon_d$ |       |
|---------------------------|-------|------|-----------------|---------------|--------------|-------|
|                           | Fe-Fe | Fe-N | Fe              | Fe            | up           | down  |
| <b>FeN<sub>4</sub>-D1</b> | 2.39  | 1.87 | -1.27           | 3.24          | -1.75        | -0.78 |
| <b>FeN<sub>4</sub>-D2</b> | 4.14  | 1.91 | -1.29           | 3.73          | -1.89        | -0.19 |
| <b>FeN<sub>4</sub>-D3</b> | 6.53  | 1.88 | -1.25           | 4.07          | -2.00        | -0.20 |
| <b>FeN<sub>4</sub>-D4</b> | 8.62  | 1.89 | -1.25           | 4.00          | -2.01        | -0.20 |

Table S2. The C-Fe bond length, O-C-O bond angle, Bader charge transfer, adsorption energy ( $E_{\text{ads}}$ , eV) and corresponding adsorption structure of  $\text{CO}_2$  adsorbed on four  $\text{FeN}_4\text{-Dx}$  structures.

| $\text{FeN}_4\text{-Dx}$                   | C-Fe (Å) | $\angle\text{O-C-O}$ (°) | Bader ( e ) |               | $E_{\text{ads}}$ (eV) | Structures                                                                            |
|--------------------------------------------|----------|--------------------------|-------------|---------------|-----------------------|---------------------------------------------------------------------------------------|
|                                            |          |                          | Fe          | $\text{CO}_2$ |                       |                                                                                       |
| <b><math>\text{FeN}_4\text{-D1}</math></b> | 2.02     | 132.99                   | -1.13       | 0.78          | -0.25                 | 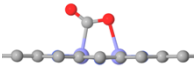   |
| <b><math>\text{FeN}_4\text{-D2}</math></b> | 2.11     | 137.75                   | -1.15       | 0.66          | -0.22                 |    |
| <b><math>\text{FeN}_4\text{-D3}</math></b> | 2.05     | 136.54                   | -1.16       | 0.70          | -0.21                 |    |
| <b><math>\text{FeN}_4\text{-D4}</math></b> | 2.05     | 137.50                   | -1.11       | 0.68          | -0.10                 |  |

Table S3. The reaction free energy of forming different intermediates on FeN<sub>4</sub>-D<sub>x</sub> (x = 1, 2, 3, 4) catalysts.

| Reaction steps                                                                              | FeN <sub>4</sub> -D1 | FeN <sub>4</sub> -D2 | FeN <sub>4</sub> -D3 | FeN <sub>4</sub> -D4 |
|---------------------------------------------------------------------------------------------|----------------------|----------------------|----------------------|----------------------|
| * + CO <sub>2</sub> → *CO <sub>2</sub>                                                      | 0.18                 | 0.22                 | 0.22                 | 0.33                 |
| *CO <sub>2</sub> + H <sup>+</sup> + e <sup>-</sup> → *COOH                                  | 0.31                 | -0.24                | -0.03                | -0.10                |
| *CO <sub>2</sub> + H <sup>+</sup> + e <sup>-</sup> → *HCOO                                  | 0.39                 | -0.34                | -0.09                | -0.13                |
| *COOH + H <sup>+</sup> + e <sup>-</sup> → *HCOOH                                            | -0.09                | 0.41                 | 0.14                 | 0.16                 |
| *HCOO + H <sup>+</sup> + e <sup>-</sup> → *HCOOH                                            | -0.17                | 0.31                 | 0.20                 | 0.20                 |
| *HCOOH → * + HCOOH                                                                          | -0.10                | 0.10                 | -0.03                | -0.10                |
| *COOH + H <sup>+</sup> + e <sup>-</sup> → *CO + H <sub>2</sub> O                            | -0.15                | -0.66                | -0.80                | -0.75                |
| *CO → * + CO                                                                                | 0.31                 | 1.32                 | 1.26                 | 1.17                 |
| *CO + H <sup>+</sup> + e <sup>-</sup> → *CHO                                                | 0.02                 | 0.66                 | 0.73                 | 0.70                 |
| *CO + H <sup>+</sup> + e <sup>-</sup> → *COH                                                | 1.79                 | 1.96                 | 1.84                 | 2.22                 |
| *CHO + H <sup>+</sup> + e <sup>-</sup> → *CH <sub>2</sub> O                                 | 0.53                 | 0.50                 | --                   | --                   |
| *CHO + H <sup>+</sup> + e <sup>-</sup> → *CHOH                                              | 0.72                 | 0.33                 | 0.27                 | 0.44                 |
| *CH <sub>2</sub> O + H <sup>+</sup> + e <sup>-</sup> → *CH <sub>3</sub> O                   | -0.06                | -0.53                | --                   | --                   |
| *CH <sub>2</sub> O + H <sup>+</sup> + e <sup>-</sup> → *CH <sub>2</sub> OH                  | -0.53                | -0.40                | --                   | --                   |
| *CHOH + H <sup>+</sup> + e <sup>-</sup> → *CH <sub>2</sub> OH                               | -0.74                | -0.23                | -0.27                | -0.42                |
| *CHOH + H <sup>+</sup> + e <sup>-</sup> → *CH + H <sub>2</sub> O                            | 1.71                 | 1.34                 | 1.31                 | 1.27                 |
| *CH <sub>2</sub> OH + H <sup>+</sup> + e <sup>-</sup> → *CH <sub>3</sub> OH                 | -0.27                | -0.06                | -0.13                | -0.14                |
| *CH <sub>3</sub> O + H <sup>+</sup> + e <sup>-</sup> → *CH <sub>3</sub> OH                  | -0.75                | 0.07                 | --                   | --                   |
| *CH <sub>3</sub> OH → * + CH <sub>3</sub> OH                                                | -0.18                | -0.13                | -0.09                | -0.15                |
| *CH <sub>3</sub> OH + H <sup>+</sup> + e <sup>-</sup> → *CH <sub>3</sub> + H <sub>2</sub> O | -0.44                | -0.79                | -0.62                | -0.64                |
| *CH <sub>2</sub> OH + H <sup>+</sup> + e <sup>-</sup> → *CH <sub>2</sub> + H <sub>2</sub> O | 0.22                 | 0.34                 | 0.30                 | 0.32                 |
| *COH + H <sup>+</sup> + e <sup>-</sup> → *CHOH                                              | -1.05                | -0.97                | -0.83                | -1.08                |
| *CH + H <sup>+</sup> + e <sup>-</sup> → *CH <sub>2</sub>                                    | -2.21                | -1.23                | -1.29                | -1.37                |
| *CH <sub>2</sub> + H <sup>+</sup> + e <sup>-</sup> → *CH <sub>3</sub>                       | -0.94                | -1.19                | -1.05                | -1.10                |
| *CH <sub>3</sub> + H <sup>+</sup> + e <sup>-</sup> → *CH <sub>4</sub>                       | -0.72                | -0.35                | -0.46                | -0.50                |
| *CH <sub>4</sub> → * + CH <sub>4</sub>                                                      | -0.21                | -0.19                | -0.20                | -0.20                |



Table S4. The reaction free energy ( $\Delta G$ , eV) of CO<sub>2</sub>RR to C<sub>2</sub> products (C<sub>2</sub>H<sub>5</sub>OH and C<sub>2</sub>H<sub>4</sub>) on FeN<sub>4</sub>-D1 catalysts.

| Reaction steps                                                                                               | FeN <sub>4</sub> -D1 |
|--------------------------------------------------------------------------------------------------------------|----------------------|
| *CO + *CO → *COCO                                                                                            | 1.53                 |
| *CO + *CHO → *COCHO                                                                                          | 0.17                 |
| *COCHO + H <sup>+</sup> + e <sup>-</sup> → *COCHOH                                                           | -0.17                |
| *COCHOH + H <sup>+</sup> + e <sup>-</sup> → *COCH + H <sub>2</sub> O                                         | 0.33                 |
| *COCHOH + H <sup>+</sup> + e <sup>-</sup> → *CHOCHOH                                                         | 0.08                 |
| *COCHOH + H <sup>+</sup> + e <sup>-</sup> → *COHCHOH                                                         | 0.74                 |
| *CHOCHOH + H <sup>+</sup> + e <sup>-</sup> → *CHOCH + H <sub>2</sub> O                                       | 0.34                 |
| *CHOCHOH + H <sup>+</sup> + e <sup>-</sup> → *CH <sub>2</sub> OCHOH                                          | 0.90                 |
| *CHOCH + H <sup>+</sup> + e <sup>-</sup> → *CHOHCH                                                           | -0.56                |
| *CHOHCH + H <sup>+</sup> + e <sup>-</sup> → *CH <sub>2</sub> OHCH                                            | 0.54                 |
| *CHOCH + H <sup>+</sup> + e <sup>-</sup> → *CHOCH <sub>2</sub>                                               | -1.21                |
| *CHOCH + H <sup>+</sup> + e <sup>-</sup> → *CH <sub>2</sub> OCH                                              | 0.94                 |
| *CHOCH <sub>2</sub> + H <sup>+</sup> + e <sup>-</sup> → *CH <sub>2</sub> OCH <sub>2</sub>                    | 1.21                 |
| *CHOCH <sub>2</sub> + H <sup>+</sup> + e <sup>-</sup> → *CHOHCH <sub>2</sub>                                 | 0.06                 |
| *CHOHCH + H <sup>+</sup> + e <sup>-</sup> → *CHOHCH <sub>2</sub>                                             | -0.59                |
| *CHOHCH <sub>2</sub> + H <sup>+</sup> + e <sup>-</sup> → *CH <sub>2</sub> OHCH <sub>2</sub>                  | -0.15                |
| *CH <sub>2</sub> OHCH <sub>2</sub> + H <sup>+</sup> + e <sup>-</sup> → *CH <sub>2</sub> OHCH <sub>3</sub>    | -0.60                |
| *CH <sub>2</sub> OHCH <sub>3</sub> → * + C <sub>2</sub> H <sub>5</sub> OH                                    | -0.16                |
| *CHOHCH <sub>2</sub> + H <sup>+</sup> + e <sup>-</sup> → *CH <sub>2</sub> CH <sub>2</sub> + H <sub>2</sub> O | -0.34                |
| *CHOHCH <sub>2</sub> + H <sup>+</sup> + e <sup>-</sup> → *CHCH <sub>2</sub> + H <sub>2</sub> O               | -0.09                |
| *CHCH <sub>2</sub> + H <sup>+</sup> + e <sup>-</sup> → *CH <sub>2</sub> CH <sub>2</sub>                      | -0.40                |
| *CH <sub>2</sub> CH <sub>2</sub> → * + C <sub>2</sub> H <sub>4</sub>                                         | -0.26                |

Table S5. Comparison of FeN<sub>4</sub>-D1 structure with some reported catalysts on the PLS free energy of C<sub>2</sub>H<sub>5</sub>OH.

| Catalysts                                                        | PLS                                              | $\Delta G$ | Ref.      |
|------------------------------------------------------------------|--------------------------------------------------|------------|-----------|
| <b>FeN<sub>4</sub>-D1</b>                                        | $*CHOCHOH + H^+ + e^- \rightarrow *CHOCH + H_2O$ | 0.34       | This work |
| <b>FeS(001)-V<sub>S1</sub></b>                                   | $*CH_2COH + H^+ + e^- \rightarrow *CH_2CHOH$     | 0.86       | 1         |
| <b>FeFe-grafiN<sub>6</sub></b>                                   | $*CO + *COH \rightarrow *HOCCO$                  | 0.68       | 2         |
| <b>Fe/GDY</b>                                                    | $*HCOOH + H^+ + e^- \rightarrow *HCO + H_2O$     | 0.43       | 3         |
| <b>Fe@B-C<sub>2</sub>N</b>                                       | $*COCO + H^+ + e^- \rightarrow *COCHO$           | 0.45       | 4         |
| <b>Fe<sub>2</sub>@6N-V<sub>4</sub>(b)</b>                        | $*C_2H_5OH \rightarrow * + C_2H_5OH$             | 0.59       | 5         |
| <b>Cu-C<sub>3</sub>N<sub>4</sub></b>                             | $*CO + H^+ + e^- \rightarrow *CHO$               | 0.75       | 6         |
| <b>T<sub>d</sub>-Cu<sub>4</sub>@g-C<sub>3</sub>N<sub>4</sub></b> | $*CO + H^+ + e^- \rightarrow *CHO$               | 0.68       | 7         |
| <b>Cu<sub>2</sub>-CuN<sub>3</sub></b>                            | $*OHCH_3 + *OCHO \rightarrow *CH_3 + *OCHO$      | 0.50       | 8         |
| <b>B@Cu(111)</b>                                                 | $*C_2H_5OH \rightarrow * + C_2H_5OH$             | 0.46       | 9         |
| <b>Cu@VO<sub>2</sub></b>                                         | $*CO + *CO \rightarrow *COCO$                    | 0.94       | 10        |

## References

1. T. G. Sentharamaikannan and D.-H. Lim, CO<sub>2</sub> Reduction to C<sub>1</sub> and C<sub>2</sub> Compounds on Sulfur-Deficient Mackinawite (FeS): A Density Functional Theory Study, *J. Phys. Chem. C*, 2022, **126**, 7012-7021.
2. S. Chen, H. Yuan, S. I. Morozov, L. Ge, L. Li, L. Xu and W. A. Goddard, 3rd, Design of a Graphene Nitrene Two-Dimensional Catalyst Heterostructure Providing a Well-Defined Site Accommodating One to Three Metals, with Application to CO<sub>2</sub> Reduction Electrocatalysis for the Two-Metal Case, *J. Phys. Chem. Lett.*, 2020, **11**, 2541-2549.
3. X. Liu, Z. Wang, Y. Tian and J. Zhao, Graphdiyne-Supported Single Iron Atom: A Promising Electrocatalyst for Carbon Dioxide Electroreduction into Methane and Ethanol, *J. Phys. Chem. C*, 2020, **124**, 3722-3730.
4. M. He, W. An, Y. Wang, Y. Men and S. Liu, Hybrid Metal-Boron Diatomic Site Embedded in C<sub>2</sub>N Monolayer Promotes C-C Coupling in CO<sub>2</sub> Electroreduction, *Small*, 2021, **17**, 2104445.
5. Y. Zhao, S. Zhou and J. Zhao, Selective C-C Coupling by Spatially Confined Dimeric Metal Centers, *iScience*, 2020, **23**, 101051.
6. Y. Jiao, Y. Zheng, P. Chen, M. Jaroniec and S. Z. Qiao, Molecular Scaffolding Strategy with Synergistic Active Centers To Facilitate Electrocatalytic CO<sub>2</sub> Reduction to Hydrocarbon/Alcohol, *J. Am. Chem. Soc.*, 2017, **139**, 18093-18100.
7. X. Bai, Q. Li, L. Shi, X. Niu, C. Ling and J. Wang, Hybrid Cu<sup>0</sup> and Cu<sup>x+</sup> as Atomic Interfaces Promote High-Selectivity Conversion of CO<sub>2</sub> to C<sub>2</sub>H<sub>5</sub>OH at Low Potential, *Small*, 2020, **16**, e1901981.

8. X. Su, Z. Jiang, J. Zhou, H. Liu, D. Zhou, H. Shang, X. Ni, Z. Peng, F. Yang, W. Chen, Z. Qi, D. Wang and Y. Wang, Complementary Operando Spectroscopy identification of in-situ generated metastable charge-asymmetry Cu<sub>2</sub>-CuN<sub>3</sub> clusters for CO<sub>2</sub> reduction to ethanol, *Nat. Commun.*, 2022, **13**, 1322.
9. J.-S. Wang, G.-C. Zhao, Y.-Q. Qiu and C.-G. Liu, Strong Boron–Carbon Bonding Interaction Drives CO<sub>2</sub> Reduction to Ethanol over the Boron-Doped Cu(111) Surface: An Insight from the First-Principles Calculations, *J. Phys. Chem. C*, 2020, **125**, 572-582.
10. Q. Yang, X. Liu, W. Peng, Y. Zhao, Z. Liu, M. Peng, Y.-R. Lu, T.-S. Chan, X. Xu and Y. Tan, Vanadium Oxide Integrated on Hierarchically Nanoporous Copper for Efficient Electroreduction of CO<sub>2</sub> to Ethanol, *J. Mater. Chem. A*, 2021, **9**, 3044-3051.

## Appendix

The optimized FeN<sub>4</sub>-D<sub>x</sub> (x = 1,2,3,4) structure details are as follows:

FeN<sub>4</sub>-D1

```
1.0000000000000000
14.7600002288999992  0.0000000000000000  0.0000000000000000
0.0000000000000000  12.7825002669999996  0.0000000000000000
0.0000000000000000  0.0000000000000000  15.0000000000000000
```

```
C   Fe   N
62   2   6
```

Direct

```
0.9999691942685673  0.0001181289924969  0.2000016865734286
0.1676260649673678  0.9996337271595026  0.2000033873985990
0.0836918866129236  0.1662678930816068  0.2000030167266955
0.2510905955387521  0.1681389205504702  0.2000033393546143
0.9999689509478171  0.1109583867338834  0.2000020734675048
0.1676335259339077  0.1114697828660389  0.2000032657679603
0.0832771031743409  0.2773930624463795  0.2000046208551101
0.2503910211938119  0.2803931639869638  0.2000005973402271
0.3342922986134588  0.9991684668763469  0.2000047063061227
0.4999668727329192  0.9987749546999547  0.2000029832761616
0.4167819911949604  0.1703188045458850  0.2000006569372834
0.5831515272027431  0.1703175211185745  0.1999998725820482
```

|                    |                    |                    |
|--------------------|--------------------|--------------------|
| 0.3343028541347725 | 0.1119297737697558 | 0.2000046302461357 |
| 0.4999656210809059 | 0.1123975295867094 | 0.2000023943087046 |
| 0.4159233364131807 | 0.2836058561127648 | 0.1999890960816003 |
| 0.5840038406565617 | 0.2836026083797669 | 0.1999852277644329 |
| 0.6656423132493139 | 0.9991656732048780 | 0.2000052362031321 |
| 0.8323098481538420 | 0.9996275391860147 | 0.2000038602294809 |
| 0.7488462704204283 | 0.1681321564589741 | 0.2000036055649881 |
| 0.9162437783615969 | 0.1662632480065873 | 0.2000029218120224 |
| 0.6656324444038036 | 0.1119295905676780 | 0.2000060168009284 |
| 0.8323021471917760 | 0.1114619857568512 | 0.2000042684007516 |
| 0.7495417350980821 | 0.2803849867427785 | 0.2000006935722949 |
| 0.9166523093629000 | 0.2773866455125667 | 0.2000054744351425 |
| 0.9999655695782890 | 0.3328718929773198 | 0.2000057123935541 |
| 0.1661137324735714 | 0.3334500850272173 | 0.2000029889814390 |
| 0.0824882266768287 | 0.5001428715815790 | 0.2000064133716846 |
| 0.2476839881238508 | 0.4997167483406727 | 0.1999952037351846 |
| 0.9999652032996810 | 0.4439757683421940 | 0.2000071972057960 |
| 0.1653800584927473 | 0.4444674584024230 | 0.2000034031399504 |
| 0.0824839083665861 | 0.6109434945972854 | 0.2000063002535623 |
| 0.2476818869506211 | 0.6113827946760658 | 0.1999946384011138 |
| 0.3324801955716533 | 0.3406619309370865 | 0.1999922074933811 |
| 0.4999629549996729 | 0.3408795355598171 | 0.1999762487183658 |

|                    |                    |                    |
|--------------------|--------------------|--------------------|
| 0.6674494924677419 | 0.3406554838983997 | 0.1999887410199478 |
| 0.8338171327814785 | 0.3334403353366527 | 0.2000033656140863 |
| 0.7522415872674412 | 0.4997081203992878 | 0.1999950975937532 |
| 0.9174395010548878 | 0.5001398277292065 | 0.2000070337941624 |
| 0.8345425041834897 | 0.4444628274763759 | 0.2000037540687870 |
| 0.7522453117815562 | 0.6113773506246994 | 0.1999949951930831 |
| 0.9174389844162490 | 0.6109442218593362 | 0.2000068812013233 |
| 0.9999635495891074 | 0.6670917292396207 | 0.2000069720173696 |
| 0.1653771823275700 | 0.6666221850028408 | 0.2000027894209659 |
| 0.0832805750579048 | 0.8336831039329112 | 0.2000041457154410 |
| 0.2503935116673468 | 0.8306883322200469 | 0.2000010062285425 |
| 0.9999658774171333 | 0.7782062583692503 | 0.2000051075530101 |
| 0.1661167397372667 | 0.7776254715486226 | 0.2000031161765974 |
| 0.0836843716414023 | 0.9448131622101775 | 0.2000026011255139 |
| 0.2510779370057176 | 0.9429461720006672 | 0.2000047081531205 |
| 0.4159365528678954 | 0.8275250802119173 | 0.1999915259577599 |
| 0.5839941002019086 | 0.8275219587479453 | 0.1999925685325475 |
| 0.3324922402404860 | 0.7704631113699975 | 0.1999911840501821 |
| 0.4999650267552410 | 0.7702333667498910 | 0.1999819749977881 |
| 0.4167893227253807 | 0.9408224866039537 | 0.2000014123183022 |
| 0.5831448617209417 | 0.9408200406840704 | 0.2000014091765444 |
| 0.8345499691178673 | 0.6666229724767911 | 0.2000039216622295 |

|                    |                    |                    |
|--------------------|--------------------|--------------------|
| 0.7495362894426522 | 0.8306846776382210 | 0.2000022508096039 |
| 0.9166517949204069 | 0.8336831860125957 | 0.2000040032894354 |
| 0.6674382880803399 | 0.7704586189432218 | 0.1999926698434000 |
| 0.8338125496031252 | 0.7776252535237294 | 0.2000034601924963 |
| 0.7488558556871762 | 0.9429412873936281 | 0.2000050878486554 |
| 0.9162526275241436 | 0.9448115167248050 | 0.2000025975634945 |
| 0.4250655330034838 | 0.5555354401814631 | 0.1999524766894367 |
| 0.5748622544931832 | 0.5555341794065840 | 0.1999465982087755 |
| 0.3300432726888013 | 0.4498309884614043 | 0.1999849997752078 |
| 0.4999606134190436 | 0.4454841402652170 | 0.1999499201280326 |
| 0.6698849722222627 | 0.4498226108468020 | 0.1999806677549257 |
| 0.3300520626766934 | 0.6612698593817553 | 0.1999856798539675 |
| 0.4999647019342855 | 0.6656152551535738 | 0.1999591665017647 |
| 0.6698796048361743 | 0.6612663505892135 | 0.1999823742703064 |



FeN<sub>4</sub>-D2

1.0000000000000000

14.7600002288999992 0.0000000000000000 0.0000000000000000

0.0000000000000000 12.7825002669999996 0.0000000000000000

0.0000000000000000 0.0000000000000000 15.0000000000000000

C N Fe

60 8 2

Direct

0.9999143340217067 0.9998824265429965 0.1999984718145782

0.1667401902786719 -0.0000391711339011 0.1999984192584628

0.0831229680459166 0.1662102736601286 0.2000022214041760

0.2498587718636338 0.1661384889271379 0.1999960023460410

0.9999166784401843 0.1110465892052459 0.2000001834423570

0.1667373764838420 0.1109630853011690 0.2000014909301301

0.0826958317479554 0.2771077095174129 0.2000057048009993

0.2484060574626832 0.2779186930897641 0.1999972915816095

0.3342664581112028 0.9988511568524836 0.2000059643230754

0.4999116877649326 0.9964529901493678 0.2000207172988775

0.4162695202715837 0.1724426213243626 0.1999595764349226

0.5835567951075163 0.1724391002299814 0.1999628134448768

0.3342844403442676 0.1120180391516096 0.1999861431111287

0.4999148751779104 0.1144143411223855 0.1999748840985935

|                    |                     |                    |
|--------------------|---------------------|--------------------|
| 0.6655579240383781 | 0.9988579537761785  | 0.2000070148485553 |
| 0.8330829186656116 | -0.0000337584469979 | 0.1999985773693865 |
| 0.7499707241874474 | 0.1661444841013013  | 0.1999970529595722 |
| 0.9167028267263847 | 0.1662086176777270  | 0.2000021403941413 |
| 0.6655465671198776 | 0.1120253220685439  | 0.1999872400620457 |
| 0.8330860667810512 | 0.1109690189344164  | 0.2000015481124790 |
| 0.7514146285261433 | 0.2779223356611665  | 0.1999990777140789 |
| 0.9171281824622212 | 0.2771032053357664  | 0.2000056308969567 |
| 0.9999060351347754 | 0.3328287727719096  | 0.2000044534464457 |
| 0.1650379700667130 | 0.3330259829065382  | 0.2000089033532115 |
| 0.0820910941978143 | 0.4999620364859593  | 0.2000029148763552 |
| 0.2460403166615676 | 0.4998624456559772  | 0.2000016989789059 |
| 0.9999106318096650 | 0.4440109863813293  | 0.2000035771146998 |
| 0.1642279204092840 | 0.4436563203116639  | 0.2000076181383457 |
| 0.0821030009340158 | 0.6109727367942750  | 0.1999962393797098 |
| 0.2460611016708938 | 0.6110576483293958  | 0.1999958721543659 |
| 0.3301408850361163 | 0.3337139013409249  | 0.1999698682603240 |
| 0.3286277210640314 | 0.4464946523043123  | 0.1999825540290451 |
| 0.6696728550538832 | 0.3337138350295699  | 0.1999739660914739 |
| 0.8347797980739921 | 0.3330250227695409  | 0.2000091985088392 |
| 0.7537798133821318 | 0.4998632042261862  | 0.2000022012097915 |
| 0.9177159241841444 | 0.4999630828334810  | 0.2000032655209056 |

|                    |                    |                    |
|--------------------|--------------------|--------------------|
| 0.6711859635628835 | 0.4464977082944278 | 0.1999856618768261 |
| 0.8355920529202931 | 0.4436537601231323 | 0.2000078463050971 |
| 0.7537558161134468 | 0.6110558288851983 | 0.1999971877598284 |
| 0.9177100878404373 | 0.6109739459426050 | 0.1999971499851740 |
| 0.9999026264927015 | 0.6669125862129184 | 0.1999957651498828 |
| 0.1642283348135735 | 0.6672588726551560 | 0.1999908017114221 |
| 0.0826822105866357 | 0.8338225033833054 | 0.1999941096907614 |
| 0.2483783611058960 | 0.8329786449259149 | 0.1999998839011939 |
| 0.9999063674455521 | 0.7781127029599504 | 0.1999954738536912 |
| 0.1650207137574147 | 0.7778813218631875 | 0.1999901701143213 |
| 0.0831167522607550 | 0.9447224477533394 | 0.1999971035576969 |
| 0.2498425239826224 | 0.9447433614809421 | 0.2000018876613107 |
| 0.3286379680211231 | 0.6644051320276714 | 0.2000138682043367 |
| 0.3301286719291507 | 0.7771730662899219 | 0.2000261601198713 |
| 0.4162405292377011 | 0.9384401499162891 | 0.2000357589437213 |
| 0.5835826310034872 | 0.9384469916646047 | 0.2000365843974055 |
| 0.6711835685915114 | 0.6644042645984329 | 0.2000155746074011 |
| 0.8355882441609166 | 0.6672657739347437 | 0.1999924372237621 |
| 0.7514405468060461 | 0.8329790689464196 | 0.2000006383663891 |
| 0.9171316145714880 | 0.8338262960225703 | 0.1999944903340372 |
| 0.6696910089831025 | 0.7771763657605851 | 0.2000264039046503 |
| 0.8347957089089337 | 0.7778893839153513 | 0.1999912470998138 |

|                    |                    |                    |
|--------------------|--------------------|--------------------|
| 0.7499842610327982 | 0.9447493773501062 | 0.2000023691532485 |
| 0.9167084543726639 | 0.9447202674634095 | 0.1999972447027615 |
| 0.4126129852911944 | 0.2826648208052845 | 0.1999271466297174 |
| 0.5872046880393784 | 0.2826662623423603 | 0.1999359540383522 |
| 0.4095316784793656 | 0.5004522298972788 | 0.1999695465639345 |
| 0.5902796624140749 | 0.5004601925241773 | 0.1999731271384421 |
| 0.4095423783380537 | 0.6104324058586545 | 0.2000325425328266 |
| 0.5902754258207644 | 0.6104365103859488 | 0.2000350305281004 |
| 0.4125944877372789 | 0.8282130224405098 | 0.2000690891284120 |
| 0.5872271949821457 | 0.8282158659724099 | 0.2000723413555440 |
| 0.4999072719899508 | 0.3944784189603389 | 0.1998944517461003 |
| 0.4999082730985298 | 0.7163761552535144 | 0.2001246500044813 |

FeN<sub>4</sub>-D3

1.0000000000000000

14.7600002288999992 0.0000000000000000 0.0000000000000000

0.0000000000000000 12.7825002669999996 0.0000000000000000

0.0000000000000000 0.0000000000000000 15.0000000000000000

C N Fe

60 8 2

Direct

0.0005584661401304 0.9990077564367473 0.2000000026796618

0.1679503141230895 0.9984596208254422 0.2000000034089700

0.0847532255143585 0.1674630599848306 0.199999998717556

0.2498063294257555 0.1702813173606820 0.2000000044832253

0.0012636740936983 0.1108266650114085 0.2000000014373087

0.1680137225949477 0.1114590459667001 0.2000000041865065

0.0845379436592082 0.2794126142783324 0.2000000058791317

0.2493366230846292 0.2845247655941094 0.2000000005977078

0.3326546301277642 0.9982814095468443 0.2000000056273145

0.5000035184713569 0.0005807737033401 0.1999999981806080

0.4147462268205568 0.1675772400782392 0.1999999948395511

0.5815611099629312 0.1729112513246168 0.2000000048337213

0.3320527846645327 0.1115101442017072 0.2000000058167923

0.4991752059481918 0.1135624254965905 0.1999999964216670

|                    |                    |                    |
|--------------------|--------------------|--------------------|
| 0.4138741723245705 | 0.2800376777870690 | 0.1999999853311381 |
| 0.6664136407446769 | 0.0041463205046752 | 0.2000000086414112 |
| 0.8324365536739742 | 0.0012552183139712 | 0.2000000009868440 |
| 0.7512299844852349 | 0.1735118778511866 | 0.2000000083661645 |
| 0.9180637938509937 | 0.1660621245260696 | 0.2000000073217267 |
| 0.6663468123583201 | 0.1181462761049825 | 0.2000000105826089 |
| 0.8332666149637887 | 0.1130674914376864 | 0.2000000018051916 |
| 0.9191359817422070 | 0.2771239091597893 | 0.2000000149734082 |
| 0.0011077167960026 | 0.3333100781898229 | 0.2000000098268244 |
| 0.1655707206110232 | 0.3403762282948186 | 0.2000000083175873 |
| 0.0801019711270030 | 0.5000877608998839 | 0.2000000060991821 |
| 0.9994089159983650 | 0.4439550073775272 | 0.2000000068162291 |
| 0.0793257247604571 | 0.6113845127611374 | 0.1999999958490511 |
| 0.3326326689748608 | 0.3405669067382485 | 0.1999999976254745 |
| 0.4966881347854657 | 0.3325165374885282 | 0.1999999944982784 |
| 0.4181195661954654 | 0.4992479005347736 | 0.2000000093784551 |
| 0.4985287310510770 | 0.4447164063612718 | 0.1999999975736838 |
| 0.4199672211893277 | 0.6114358537116994 | 0.2000000110676320 |
| 0.5840365375293352 | 0.6033963797250690 | 0.2000000084135996 |
| 0.8373505667755072 | 0.3325791657830894 | 0.2000000112036260 |
| 0.9172799290634994 | 0.4999779052540130 | 0.1999999987728602 |
| 0.8365773287570570 | 0.4438586004182249 | 0.2000000009196354 |

|                    |                    |                    |
|--------------------|--------------------|--------------------|
| 0.7511041636586506 | 0.6035699722705246 | 0.199999993283851  |
| 0.9155729040950191 | 0.6106244805194367 | 0.1999999975555453 |
| 0.9975405495030704 | 0.6668102052210823 | 0.1999999917665256 |
| 0.0833770091381537 | 0.8308729337132601 | 0.2000000035996550 |
| 0.2503183962887102 | 0.8257888839386299 | 0.1999999958538846 |
| 0.9985983301508334 | 0.7778610291507783 | 0.1999999982560719 |
| 0.1654332693500524 | 0.7704449367198345 | 0.1999999976001022 |
| 0.0842122836513331 | 0.9426726821815861 | 0.2000000049847999 |
| 0.2502557211682820 | 0.9397850839930830 | 0.1999999975943169 |
| 0.5027822603737889 | 0.6639126727632949 | 0.2000000201870481 |
| 0.4174967063639268 | 0.8303672941429806 | 0.2000000088965975 |
| 0.5846120424065629 | 0.8324306054359991 | 0.2000000014545252 |
| 0.3351002138174154 | 0.7710230368055579 | 0.2000000011698938 |
| 0.5019248110029646 | 0.7763638625994075 | 0.2000000113865847 |
| 0.4166838671164789 | 0.9433460429800327 | 0.2000000064714115 |
| 0.5840199290746092 | 0.9456596409741568 | 0.2000000001300893 |
| 0.6673397804554989 | 0.6594273449584741 | 0.2000000055067817 |
| 0.8321432408005482 | 0.6645219139213855 | 0.2000000005888849 |
| 0.7486522618312960 | 0.8324994784614301 | 0.2000000027283686 |
| 0.9154009125752843 | 0.8330799233510414 | 0.2000000041829092 |
| 0.6668653927058857 | 0.7736678250101842 | 0.2000000019081025 |
| 0.8319089991493193 | 0.7764673359522355 | 0.2000000065751575 |

|                    |                    |                    |
|--------------------|--------------------|--------------------|
| 0.7487115914842459 | 0.9454841770633764 | 0.2000000028225856 |
| 0.9160976873864196 | 0.9449122631690153 | 0.2000000027172105 |
| 0.5779793573114708 | 0.2816145321965446 | 0.199999996745256  |
| 0.7553165349993556 | 0.2815040699036938 | 0.2000000181329567 |
| 0.1619116765186040 | 0.4488021968717613 | 0.2000000063937551 |
| 0.5801095773398269 | 0.4953081287630923 | 0.2000000035971263 |
| 0.3365439520669565 | 0.4486513080727600 | 0.2000000017473105 |
| 0.7547573875158811 | 0.4951395636554505 | 0.2000000012352548 |
| 0.1613493634005092 | 0.6624644779830715 | 0.1999999873624593 |
| 0.3386824269523777 | 0.6623389977180761 | 0.2000000069085568 |
| 0.2495008477937978 | 0.5559469248473372 | 0.1999999894460509 |
| 0.6671494241635052 | 0.3880078546582301 | 0.2000000096020015 |



FeN<sub>4</sub>-D4

1.0000000000000000

14.7600002288999992 0.0000000000000000 0.0000000000000000

0.0000000000000000 12.7825002669999996 0.0000000000000000

0.0000000000000000 0.0000000000000000 15.0000000000000000

C N Fe

60 8 2

Direct

0.0017478672426712 -0.0044254052078998 0.1999943070379772

0.1682439008032684 0.9933579607503722 0.1999837155066599

0.0862388146031142 0.1653097299915733 0.1999756718751800

0.2519654786081856 0.1675439241315440 0.1999969347542085

0.0028740879758617 0.1081889591836500 0.1999877791990821

0.1692057017626158 0.1077390203611882 0.1999825556455028

0.0845050664508460 0.2783593488978854 0.2000109064831305

0.2505445328392018 0.2805946753072140 0.2000046853237487

0.3357564275858118 0.0018046279321057 0.2000606390394288

0.5034266686091285 0.0034198267818670 0.2000531791852581

0.4226620287026186 0.1719850329681244 0.1999740873165200

0.3373547087176881 0.1144126080870747 0.2000138911076536

0.5072184588226667 0.1153619993164899 0.2000264569907332

0.4205692096897317 0.2850633677521676 0.1998587750838704

|                     |                     |                    |
|---------------------|---------------------|--------------------|
| 0.6693869206510502  | -0.0027290486628364 | 0.2000412381980970 |
| 0.8351307029634495  | 0.9965418838107555  | 0.2000323920364815 |
| 0.7537447566808798  | 0.1613037418290323  | 0.2000691078685994 |
| 0.9193772637371243  | 0.1633829797828696  | 0.2000217737864803 |
| 0.6700120254774843  | 0.1064206009614777  | 0.2000787146045410 |
| 0.8362432714517390  | 0.1071319460297117  | 0.2000520033750478 |
| 0.9160852334697774  | 0.2751008882310468  | 0.2000154555701152 |
| -0.0004961836916728 | 0.3326996598634789  | 0.2000181290413611 |
| 0.1670446708225836  | 0.3381425634112831  | 0.2000337662252230 |
| 0.0795760940343051  | 0.5058695253180270  | 0.2000399100420070 |
| 0.2497672087778529  | 0.5092081186920892  | 0.2000822868322263 |
| -0.0028660089453453 | 0.4447508640131116  | 0.2000197677609831 |
| 0.1652844527170274  | 0.4523006690441554  | 0.2000657904420207 |
| 0.3341384544201191  | 0.3377391569988141  | 0.1999450774449195 |
| 0.8291299331401952  | 0.3262171519329118  | 0.1999646050603829 |
| 0.7424567581219563  | 0.4960164694202647  | 0.1996811516992681 |
| 0.9108892744317671  | 0.4953927077588997  | 0.1999511688582274 |
| 0.8265386575379291  | 0.4384600105657819  | 0.1998612429055769 |
| 0.7462871413576533  | 0.6078389592976023  | 0.1997162956131548 |
| 0.9117599855961720  | 0.6070825994012131  | 0.1999657110232651 |
| -0.0060490797717771 | 0.6634291721578879  | 0.2000083088612301 |
| -0.0047788075298179 | 0.7754189980401192  | 0.2000105061913005 |

|                    |                    |                    |
|--------------------|--------------------|--------------------|
| 0.0832982905930547 | 0.9360363558319016 | 0.1999706136379415 |
| 0.2532256665234834 | 0.9403295265250654 | 0.2000492777336286 |
| 0.4196818398717702 | 0.8369419210875269 | 0.2000769570995185 |
| 0.5844064125586788 | 0.8345130074063111 | 0.1999089096697354 |
| 0.3376721744241926 | 0.7813264085124750 | 0.2001377344456845 |
| 0.5014683632147774 | 0.7802703394965130 | 0.1999184031853410 |
| 0.4198673371438070 | 0.9484775112540210 | 0.2000808729544145 |
| 0.5852371744109349 | 0.9446068144431663 | 0.2000118399395812 |
| 0.8295158581984511 | 0.6631782474276812 | 0.1998988458794612 |
| 0.7498819067453144 | 0.8313162934604205 | 0.1999369277993645 |
| 0.9141014533475643 | 0.8302338695121519 | 0.2000288106702896 |
| 0.6666349634417760 | 0.7774384050684336 | 0.1998247066789873 |
| 0.8310884819339437 | 0.7740465539806025 | 0.1999724279615524 |
| 0.7519148394119699 | 0.9416298610304877 | 0.2000116257889694 |
| 0.9173611102404761 | 0.9413827699424122 | 0.2000299926081299 |
| 0.3317560350274991 | 0.4498839744667115 | 0.1999545831177626 |
| 0.4969908722092618 | 0.4495713746201769 | 0.1996008304641279 |
| 0.3365589892877083 | 0.6697120224495186 | 0.2001101413828281 |
| 0.5001294136120797 | 0.6703617284372344 | 0.1997753325008690 |
| 0.6654585295538340 | 0.6670265745230483 | 0.1996737108966322 |
| 0.5818481129134065 | 0.6138868339547451 | 0.1995744756265772 |
| 0.5807848941226589 | 0.5048349906801037 | 0.1994912603577301 |

|                    |                    |                    |
|--------------------|--------------------|--------------------|
| 0.4178205133613645 | 0.6152371336863650 | 0.1998875215113897 |
| 0.4155426946755050 | 0.5044166356218874 | 0.1997945067728041 |
| 0.5909914077872644 | 0.1641018597332228 | 0.2000256240683951 |
| 0.7499330910263370 | 0.2686759625194404 | 0.1999886745798917 |
| 0.0764036180947642 | 0.6141867211561723 | 0.2000126644787983 |
| 0.2545715207127355 | 0.6180325419009578 | 0.2001522071887814 |
| 0.5001850058755682 | 0.3420911646082985 | 0.1996803993919979 |
| 0.0776168680021867 | 0.8271890035149423 | 0.1999752468124643 |
| 0.2557463994448390 | 0.8316199057813451 | 0.2001061401015266 |
| 0.6592259041148469 | 0.4470827786104115 | 0.1995375959541032 |
| 0.6250980318695764 | 0.3054142780066529 | 0.1997621074414484 |
| 0.1661164283845021 | 0.7229312845985668 | 0.2000312403097702 |
